# Supplementary material for: Co-assembly of curcumin and a cystine bridged peptide to construct tumor-responsive nano-micelles for efficient chemotherapy
Source: Royal Society of Chemistry journal article supplement (doi:10.1039/c9tb02625h), 2020-01-01
Supplement: c9tb02625h1.pdf [file c9tb02625h1.pdf]

## Supporting Information

### **Co-assembly of curcumin and cystine bridged peptide to construct tumor-responsive nano-micells for efficient chemotherapy**

Yemei Dai, ‡<sup>a</sup> Zelei Jiang, ‡<sup>a</sup> Jingyi Li,<sup>a</sup> Mengfan Wang,<sup>\*,a,b</sup> Chang Liu,<sup>c</sup> Wei Qi,<sup>\*,a,b,d</sup>

Rongxin Su,<sup>a,b,d</sup> Zhimin He <sup>a</sup>

<sup>a</sup>. School of Chemical Engineering and Technology, State Key Laboratory of Chemical Engineering, Tianjin University, Tianjin 300350, P. R. China.

<sup>b</sup>. The Co-Innovation Centre of Chemistry and Chemical Engineering of Tianjin, Tianjin 300072, P. R. China.

<sup>c</sup>. Tianjin Key Laboratory of Membrane Science and Desalination Technology, Tianjin 300350, P. R. China.

E-mail: mawang@tju.edu.cn, qiwei@tju.edu.cn

‡ These authors contributed equally to this work.

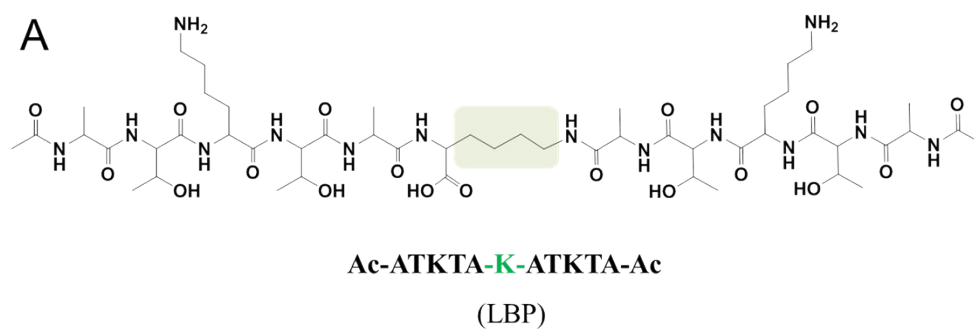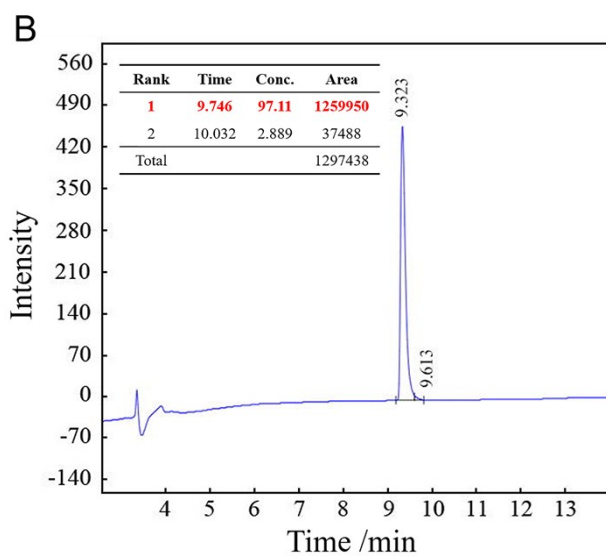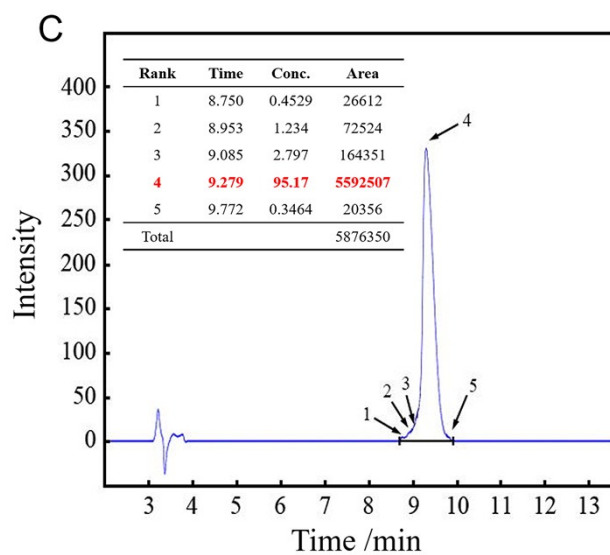

**Fig. S1** (A) Molecular structure of LBP. The LBP has a similar sequence to that of CBP but lacks a disulfide bond. HPLC analysis of CBP (B) and LBP (C). Both peptides had a purity above 95%.

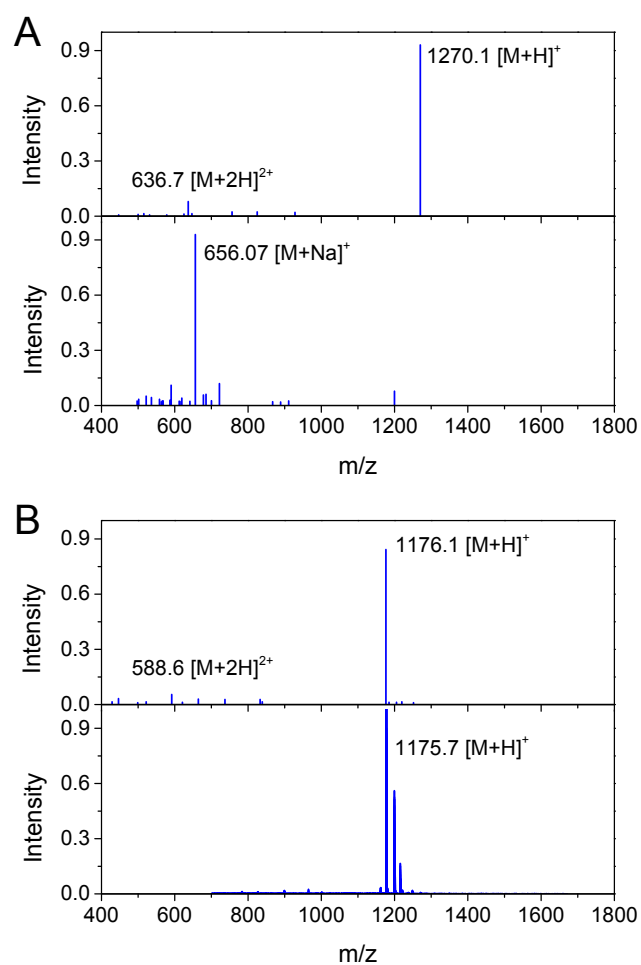

**Fig. S2** Evaluation of the redox responsiveness of CBP (A) and LBP (B) by MALDI-TOF MS. Top row: before incubation with GSH, bottom row: after incubation with GSH.

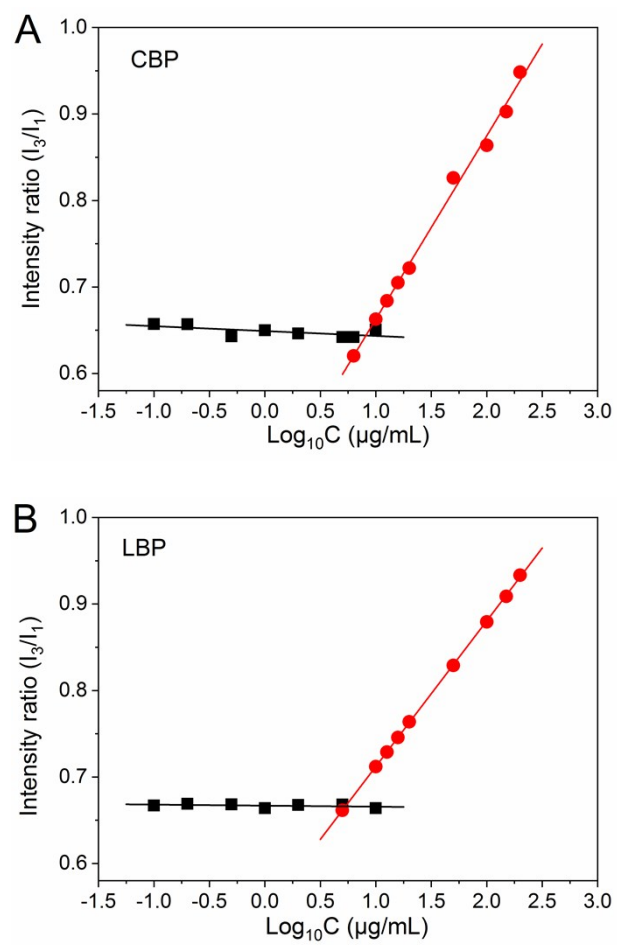

**Fig. S3** Critical aggregation concentration of CBP (8.23  $\mu\text{g/mL}$ ) and LBP (5.29  $\mu\text{g/mL}$ ).

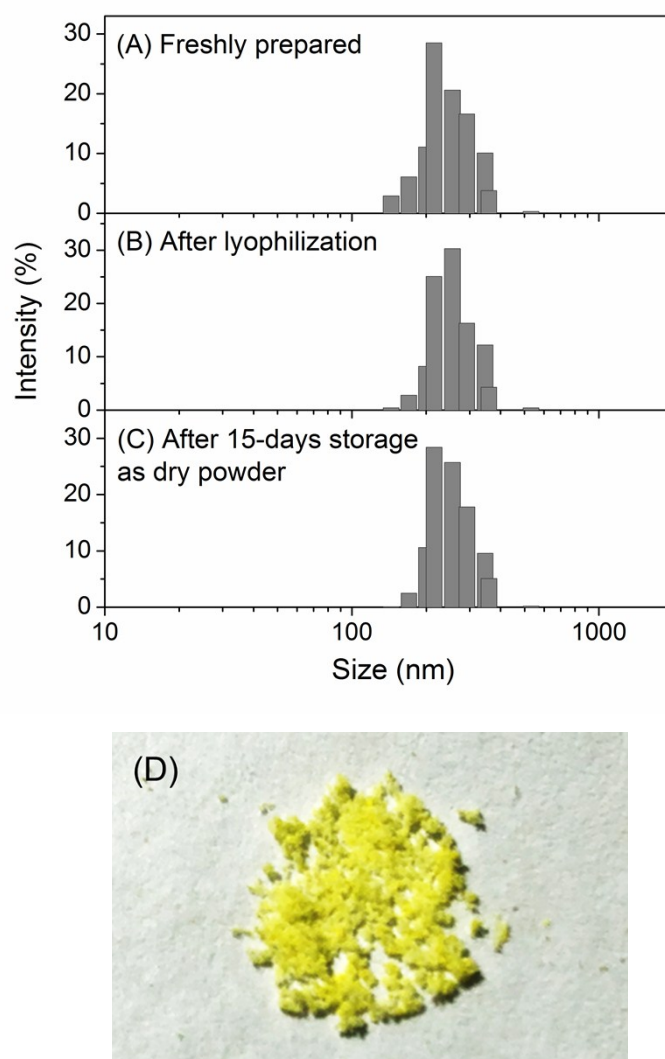

**Fig. S4** DLS analysis of freshly prepared CCM-CBP micelles (A), CCM-CBP micelles after lyophilization (B), and after 15-days storage under 4 °C as a freeze-dried powder (C). Photograph of freeze-dried CCM-CBP powder (D).

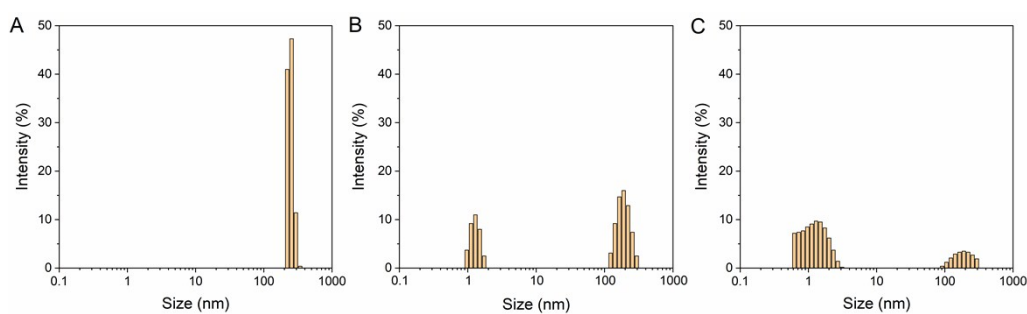

**Fig. S5** DLS analysis of CCM-CBP nanomicelles incubated in GSH solution (8 mM, pH7.4) at 0 h (A), 4 h (B) and 24 h (C).

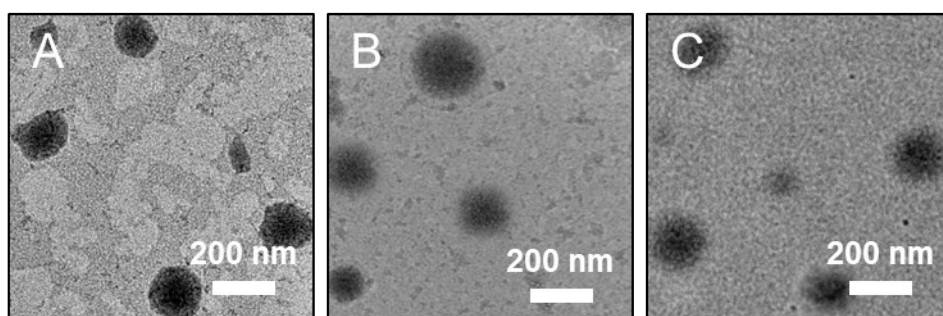

**Fig. S6** Stability of CCM-LBP micelles (A) in 20% (v/v) FBS solution without (B) or with (C) 8 mM of GSH. Incubation time: 24 h.

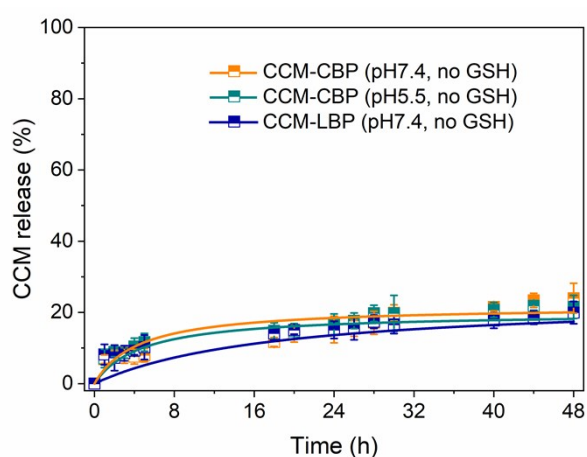

**Fig. S7** Long-time release profiles of CCM-CBP micelles in the absence of GSH and CCM-LBP micelles in the presence of GSH.

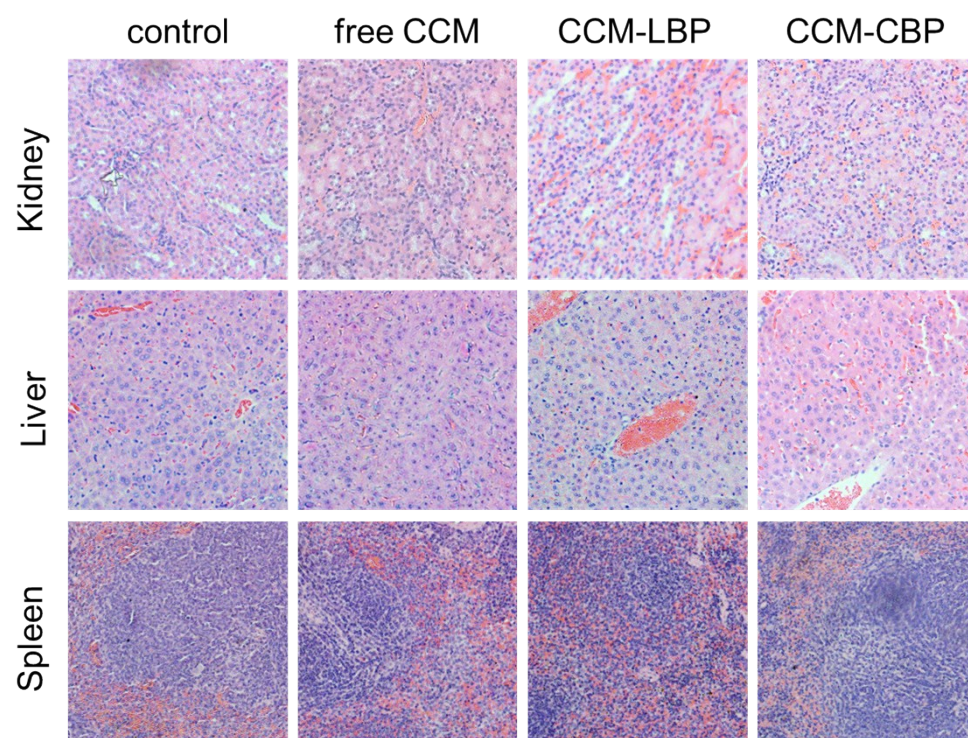

**Fig. S8** H&E staining results for kidney, liver and spleen slices.
